# Supplementary material
Source: PubMed Central journal article supplement (PMC2747220)
Supplement: 0907324106_0907324106SI.pdf [file 0907324106_0907324106SI.pdf]

# Supporting Information

Roseti et al. 10.1073/pnas.0907324106

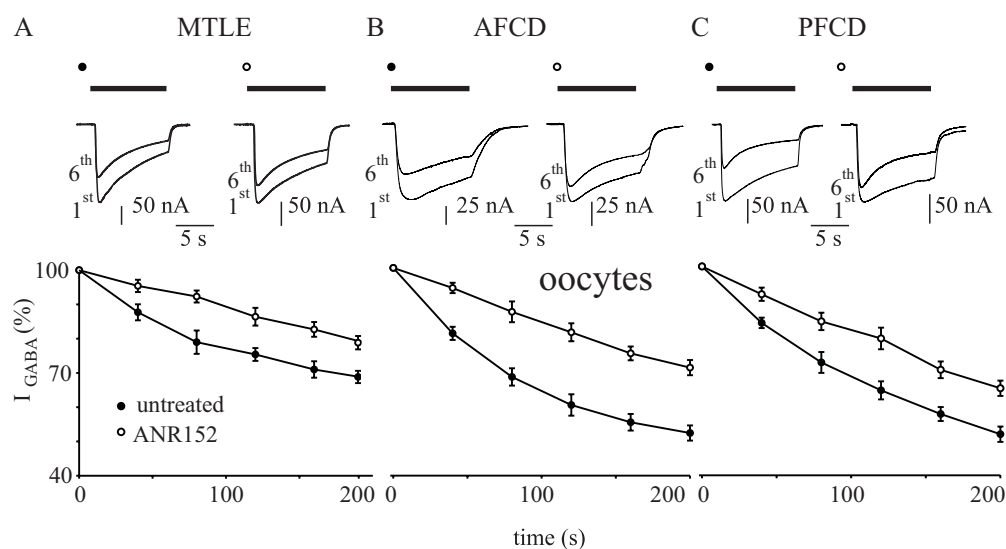

**Fig. S1.** The  $A_{2A}$  antagonist ANR152 (100 nM) decreases  $I_{GABA}$  desensitization in oocytes injected with human epileptic cortex membranes as indicated. (A) (Top) Current traces elicited by the first and sixth GABA applications to single oocytes, representative of 11 microinjected with MTLE membranes (4 frogs; patients 2 and 3). Holding potential,  $-60$  mV. (A) (Bottom) Time courses averaged from 11 oocytes before (filled circles) and after a 1-h treatment with ANR152 (open circles).  $I_{GABA}$  values were normalized to the first  $I_{GABA}$  peak current, with  $I_{GABA}$  amplitudes ranging from  $-175 \pm 11$  nA in untreated oocytes to  $-162 \pm 9$  nA after ANR152 treatment ( $P > .05$ );  $500 \mu\text{M}$  GABA, 10 s duration, 40 s interval. (B) (Top) Representative currents as in (A) in oocytes injected with AFCD membranes representative of 9 experiments (2 frogs, patients 10 and 12). (Bottom) Time courses averaged from 9 oocytes treated as indicated.  $I_{GABA}$  was normalized to  $-81.3 \pm 4$  nA (filled circles) and  $-90.5 \pm 2$  nA (open circles) ( $P > .05$ ). (C) (Top) Representative currents as in (A) in oocytes injected with PFCD membranes representative of 8 experiments (2 frogs, patient 6). (Bottom) Time courses averaged from 8 oocytes treated as indicated.  $I_{GABA}$  was normalized as in (A) to  $-169 \pm 10$  nA (filled circles) and  $-140 \pm 9$  nA (open circles) ( $P > .02$ ). Note that at a concentration of 100 nM, ANR152 interferes with  $A_1$  activity (see Table 2).

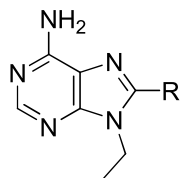

**ANR 82;** R = Br

**ANR 94;** R = O-CH<sub>2</sub>-CH<sub>3</sub>

**ANR 152;** R = 2-furyl

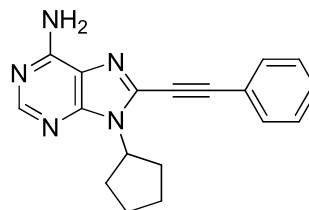

**ANR 235**

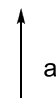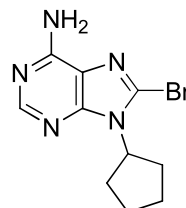

**ANR 168**

a. Ph-C≡CH, (Ph<sub>3</sub>P)<sub>2</sub>PdCl<sub>2</sub>, CuI, Et<sub>3</sub>N

Fig. S2. Adenine derivative structures and ANR 235 synthetic scheme.

**Table S1. Clinical and neurophysiological characteristics of epileptic patients**

| Patient | Sex | Age      | Age at onset of epilepsy | MRI findings        | Epileptogenic zone | Surgery   | Histopathology |
|---------|-----|----------|--------------------------|---------------------|--------------------|-----------|----------------|
| 1       | F   | 37 years | 12 years                 | R-T-Mes             | R-T-Mes-Lat        | ETL       | MES            |
| 2       | M   | 42 years | 15 years                 | R-T-Mes             | R-T-Mes-Lat        | ETL       | MES            |
| 3       | M   | 40 years | 1 year                   | L-T-Mes             | L-T-Mes-Lat        | ETL       | MES            |
| 4       | F   | 38 years | 19 years                 | R-T-Mes             | R-T-Mes-Lat        | ETL       | MES            |
| 5       | M   | 18 years | 11 years                 | R-T-Mes             | R-T-Mes-Lat        | ETL       | MES            |
| 6       | F   | 3 months | 1 month                  | R-T-FCD R-T-Mes-Lat | LES                | FCD IIA   |                |
| 7       | M   | 2 years  | 0.5 month                | R-T-FCD             | R-T-Mes-Lat        | LES       | FCD IIB        |
| 8       | M   | 5 years  | 4 years                  | R-F-FCD             | R-F                | LES       | FCD IIA        |
| 9       | F   | 12 years | 3 years                  | R-T-FCD             | R-T-Mes-Lat        | LES       | FCD IIA        |
| 10      | M   | 48 years | 6 years                  | L-T-FCD             | L-T-Mes-Lat        | LES       | FCD IIA        |
| 11      | F   | 38 years | 19 years                 | R-T-FCD             | R-T-Mes-Lat        | ETL       | FCD IA         |
| 12      | F   | 19 years | 11 years                 | R-T-FCD             | R-T-Mes-Lat        | ATL       | FCD IIA        |
| 13      | M   | 61 years | 16 years                 | R-T-Ant             | R-T-Mes-Ant        | ATL       | MES            |
| 14      | F   | 57 years | 9 years                  | L-T-Ant             | L-T-Mes-Ant        | ATL       | MES            |
| 15      | M   | 33 years | 5 years                  | L-T-Mes             | L-T-Mes-Lat        | ETL       | MES            |
| 16      | F   | 32 years | 12 years                 | R-T-Mes             | R-T-Mes-Lat        | ETL       | MES            |
| 17      | M   | 20 years | 8 years                  | L-T-Mes             | L-T-Mes-Lat        | ETL       | MES            |
| 18      | F   | 50 years | 12 years                 | L-T-Ant             | L-T-Mes-Ant        | ATL       | MES            |
| 19      | F   | 44 years | 17 years                 | L-T-Ant             | L-T-Mes-Ant        | ATL       | MES            |
| 20      | F   | 25 years | 11 years                 | R-F-FCD             | R-F                | LES       | FCD IIB        |
| 21      | F   | 21 years | 24 years                 | L-T-FCD             | L-T-Mes-Lat        | LES       | FCD IIB        |
| 22      | M   | 22 years | 5 months                 | L-T-Mes             | L-T-Mes-Lat        | LES + ETL | G              |
| 23      | M   | 13 years | 2 months                 | L-T-Ant             | R-T-Mes-Ant        | ATL       | G              |

T, temporal; F, frontal; L, left; R, right; Lat, lateral; Mes, mesial; Ant, anterior; ETL, extensive temporal lobectomy; LES, lesionectomy; ATL anterior-temporal lobectomy; MES, hippocampal mesial sclerosis; G, ganglioglioma (grade I).

**Table S2. Affinities of 8-substituted-9-ethyladenines in radioligand binding assays to human adenosine A<sub>1</sub>, A<sub>2A</sub>, and A<sub>3</sub> receptors**

| Compound | K <sub>i</sub> , nM (95% CI)  |                                |                               | Selectivity                           |                                       |
|----------|-------------------------------|--------------------------------|-------------------------------|---------------------------------------|---------------------------------------|
|          | K <sub>i</sub> A <sub>1</sub> | K <sub>i</sub> A <sub>2A</sub> | K <sub>i</sub> A <sub>3</sub> | A <sub>1</sub> /A <sub>2A</sub>       | A <sub>3</sub> /A <sub>2A</sub>       |
| ANR82    | 280<br>(250–320)              | 52<br>(24–110)                 | 27,800<br>(22,300–34,700)     | 5                                     | 535                                   |
| ANR94    | 2,400<br>(2,100–2,600)        | 46<br>(24–91)                  | 21,000<br>(11,000–41,000)     | 52                                    | 457                                   |
| ANR152   | 24<br>(16–34)                 | 3.7<br>(3.0–4.6)               | 4,700<br>(2,900–7,600)        | 6                                     | 1,270                                 |
| ANR235   | 3,320<br>(3,082–3,580)        | 1,320<br>(871–1,990)           | 30<br>(18–50)                 | A <sub>1</sub> /A <sub>3</sub><br>111 | A <sub>2A</sub> /A <sub>3</sub><br>44 |

**Table S3. The A<sub>2A</sub> antagonist ANR94 specifically modulates GABA<sub>A</sub> receptors in human patch-clamped pyramidal neurons in temporal slices obtained from patients with epileptic low-grade glioma**

| Drug treatment (dose)      | Tested neurons [patients] | I <sub>GABA</sub> , %, before treatment ( <i>n</i> ) | I <sub>GABA</sub> , %, after treatment | <i>P</i> |
|----------------------------|---------------------------|------------------------------------------------------|----------------------------------------|----------|
| MTLE                       |                           |                                                      |                                        |          |
| ANR94 (100 nM)             | 10 [13–15]                | 72 ± 4*                                              | 69 ± 4*                                | >0.5     |
| Epileptic perigloma tissue |                           |                                                      |                                        |          |
| ANR94 (100 nM)             | 3 [22]                    | 46 ± 4 ( <b>3</b> )                                  | 59 ± 6                                 | <0.05    |
| ANR94 (100 nM)             | 5 [23]                    | 85 ± 4 ( <b>5</b> )                                  | <b>65 ± 3</b>                          | <0.05    |

*I*<sub>GABA</sub> (%) values represent the tenth *I*<sub>GABA</sub> amplitude normalized to the first of the rundown protocol. *n*, number of oocytes responsive to AR antagonists. Set of cells in which rundown increases and *n* are in bold. \*, Not significantly different.
